# Supplementary material
Source: MDPI journal article supplement (https://www.mdpi.com/2071-1050/11/6/1653)
Supplement: s1 [file s1]

**Table S1.** Cumulative precipitation and mean temperature during 2007-2010 period and the long-term meteorological series (1973–2010) at the site of Ussana (39° N, 9° E; 114 m a.s.l.).

| Months                       | Long-term | 2007-2008 | 2008-2009 | 2009-2010 |
|------------------------------|-----------|-----------|-----------|-----------|
| Maximum temperature (°C)     |           |           |           |           |
| November                     | 19.2      | 20.0      | 20.5      | 21.9      |
| December                     | 16.1      | 17.5      | 15.4      | 16.8      |
| January                      | 15.0      | 19.6      | 15.7      | 14.2      |
| February                     | 15.3      | 18.4      | 16.0      | 16.8      |
| March                        | 17.5      | 18.6      | 19.0      | 18.8      |
| April                        | 20.0      | 23.7      | 21.4      | 23.2      |
| May                          | 25.0      | 27.4      | 28.4      | 24.1      |
| June                         | 29.7      | 31.2      | 32.2      | 29.1      |
| Minimum temperature (°C)     |           |           |           |           |
| November                     | 9.0       | 8.8       | 10.2      | 9.0       |
| December                     | 6.2       | 5.6       | 6.3       | 7.3       |
| January                      | 5.0       | 5.4       | 5.5       | 5.8       |
| February                     | 4.9       | 4.1       | 3.9       | 7.4       |
| March                        | 6.0       | 7.0       | 6.7       | 7.0       |
| April                        | 7.9       | 8.6       | 10.4      | 9.2       |
| May                          | 11.4      | 14.0      | 12.4      | 12.2      |
| June                         | 14.9      | 16.3      | 15.6      | 15.5      |
| Total rainfall rainfall (mm) |           |           |           |           |
| November                     | 22.5      | 34.8      | 67.6      | 39.8      |
| December                     | 20.4      | 33.1      | 75.4      | 29        |
| January                      | 15.1      | 33        | 118       | 113       |
| February                     | 15.9      | 17.4      | 38.8      | 50.2      |
| March                        | 13.2      | 46        | 47.4      | 23.6      |
| April                        | 16.1      | 10.8      | 111.6     | 58.1      |
| May                          | 8.5       | 31.2      | 12        | 67        |
| June                         | 4.1       | 4.2       | 2.6       | 37.3      |

**Table S2.** Cumulative precipitation and mean temperature during 2007-2010 period and the long-term meteorological series (1958–2008) at the site of Ottawa (40° N, 8° E; 81 m a.s.l.).

| Months                       | Long-term | 2007-2008 | 2008-2009 | 2009-2010 |
|------------------------------|-----------|-----------|-----------|-----------|
| Maximum temperature (°C)     |           |           |           |           |
| November                     | 17.6      | 16.0      | 16.3      | 17.1      |
| December                     | 14.2      | 12.8      | 12.1      | 13.3      |
| January                      | 13.3      | 13.3      | 11.6      | 10.8      |
| February                     | 13.6      | 13.8      | 12.6      | 12.1      |
| March                        | 15.4      | 15.3      | 14.5      | 15.0      |
| April                        | 17.8      | 18.6      | 17.7      | 19.1      |
| May                          | 22.2      | 22.9      | 25.3      | 21.4      |
| June                         | 26.5      | 27.2      | 28.8      | 27.7      |
| Minimum temperature (°C)     |           |           |           |           |
| November                     | 9.7       | 8.7       | 9.8       | 10.3      |
| December                     | 7.2       | 6.1       | 7.0       | 8.2       |
| January                      | 6.0       | 6.1       | 5.9       | 3.1       |
| February                     | 6.0       | 5.3       | 4.2       | 3.3       |
| March                        | 6.8       | 6.6       | 6.9       | 5.0       |
| April                        | 8.7       | 10.2      | 10.5      | 8.3       |
| May                          | 11.9      | 14.1      | 14.8      | 11.5      |
| June                         | 15.1      | 16.4      | 17.1      | 15.2      |
| Total rainfall rainfall (mm) |           |           |           |           |
| November                     | 91.3      | 49.8      | 166.1     | 85.9      |
| December                     | 72.3      | 53.1      | 138.4     | 83.0      |
| January                      | 50.3      | 53.9      | 83.4      | 90.8      |
| February                     | 44.9      | 30.8      | 50.3      | 73.1      |
| March                        | 48.4      | 77.3      | 64.7      | 62.5      |
| April                        | 46.3      | 27.9      | 77.5      | 76.1      |
| May                          | 35.0      | 69.0      | 15.4      | 69.7      |
| June                         | 15.9      | 27.2      | 19.5      | 60.8      |

**Table S3.** Soil properties at Ussana (Petrocalcic Palexeralf)<sup>1</sup> and Ottawa (Lithic Xerorthents) experimental sites at the beginning of experiment in 2007.

| Soil parameters                   | Sites  |        |
|-----------------------------------|--------|--------|
|                                   | Ussana | Ottava |
| Clay (%)                          | 22.1   | 16.5   |
| Silt (%)                          | 21.5   | 16.0   |
| Field capacity (%)                | 33     | 30     |
| Wilting point (%)                 | 17     | 17     |
| Bulk density (g m <sup>-3</sup> ) | 1.25   | 1.27   |
| pH                                | 7.9    | 8.4    |
| Total N (%)                       | 0.07   | 0.21   |
| Soil organic matter (%)           | 1.2    | 1.7    |
| Organic C (%)                     | 0.83   | 2.98   |

<sup>1</sup>[88]

**Table S4.** Agronomical management at both experimental fields

| Cultivation details |                  |                                                                                 |
|---------------------|------------------|---------------------------------------------------------------------------------|
| Previous crop       |                  | Winter cereals                                                                  |
| Tillage operations  |                  |                                                                                 |
|                     | Ploughing        | 25 cm                                                                           |
|                     | Harrowing        | 15 cm                                                                           |
| Seedbed preparation | Rolling          |                                                                                 |
| Sowing              |                  |                                                                                 |
|                     | Cultivar         | Kabel                                                                           |
|                     | Density          | 120 seeds m <sup>-2</sup>                                                       |
|                     | Depth            | 2 cm                                                                            |
| Fertilization       |                  |                                                                                 |
|                     | At sowing        | 36 kg N ha <sup>-1</sup> ; 92 kg P <sub>2</sub> O <sub>5</sub> ha <sup>-1</sup> |
|                     | Before flowering | 92 kg N ha <sup>-1</sup>                                                        |

**Table S5.** Less relative weed abundant (%) species during the 3-year experiment at Ottawa site. See also data repository for raw data (<http://dx.doi.org/10.17632/gmg62gv9y9.1>).

| Year                 | Treatment     | <i>Beta vulgaris</i> L. | <i>Geranium molle</i> L. | <i>Medicago polymorpha</i> L. | <i>Polygonum aviculare</i> L. | <i>Stellaria media</i> (L.) Vill. | <i>Veronica persica</i> Poir. |     |
|----------------------|---------------|-------------------------|--------------------------|-------------------------------|-------------------------------|-----------------------------------|-------------------------------|-----|
| 2008                 | T             | 0.0                     | 0.0                      | 0.0                           | 0.0                           | 0.0                               | 0.0                           |     |
|                      | M50           | 0.0                     | 0.0                      | 0.0                           | 0.0                           | 0.0                               | 0.0                           |     |
|                      | M75           | 0.0                     | 0.0                      | 0.0                           | 0.0                           | 0.0                               | 0.0                           |     |
|                      | M100          | 0.0                     | 0.0                      | 0.0                           | 0.0                           | 0.0                               | 0.0                           |     |
|                      | PE            | 0.0                     | 0.0                      | 0.0                           | 0.0                           | 0.0                               | 0.0                           |     |
|                      | W             | 0.0                     | 0.0                      | 0.0                           | 0.0                           | 0.0                               | 0.0                           |     |
| 2009                 | M25           | 10.0                    | 0.0                      | 6.9                           | 0.0                           | 0.0                               | 0.0                           |     |
|                      | M50           | 6.1                     | 0.0                      | 4.0                           | 0.0                           | 0.0                               | 0.0                           |     |
|                      | M75           | 0.0                     | 0.0                      | 0.0                           | 0.0                           | 0.0                               | 0.0                           |     |
|                      | M100          | 0.0                     | 0.0                      | 0.0                           | 0.0                           | 0.0                               | 0.0                           |     |
|                      | PE            | 2.9                     | 0.0                      | 7.4                           | 0.0                           | 0.0                               | 0.0                           |     |
|                      | W             | 6.2                     | 0.0                      | 5.4                           | 0.0                           | 0.0                               | 0.0                           |     |
| 2010                 | M25           | 0.0                     | 7.3                      | 0.0                           | 3.1                           | 6.1                               | 6.4                           |     |
|                      | M50           | 0.0                     | 5.0                      | 0.0                           | 7.3                           | 0.0                               | 0.0                           |     |
|                      | M75           | 0.0                     | 0.0                      | 0.0                           | 0.0                           | 0.0                               | 0.0                           |     |
|                      | M100          | 0.0                     | 0.0                      | 0.0                           | 0.0                           | 0.0                               | 0.0                           |     |
|                      | PE            | 0.0                     | 5.3                      | 0.0                           | 6.5                           | 6.4                               | 5.6                           |     |
|                      | W             | 0.0                     | 5.9                      | 0.0                           | 6.0                           | 0.0                               | 0.0                           |     |
| Analysis of variance | Year (T)      | 2                       | **                       | **                            | **                            | *                                 | ***                           | *** |
|                      | Treatment (T) | 5                       | ***                      | ***                           | **                            | **                                | ***                           | *** |
|                      | YxT           | 10                      | ***                      | ***                           | **                            | ***                               | ***                           | *** |

M25, M50, M75, M100 = metazachlor at 25%, 50%, 75%, 100% of the labelled dose, respectively; T = Trifluralin; PE = post-emergence treatment; W = weedy treatment.

The asterisks \*, \*\*, \*\*\*, or ns indicate statistical differences at  $P < 0.05$ ,  $P < 0.01$ ,  $P < 0.001$ , or non significant, respectively.
